# Supplementary material for: Dietary supplementation with aromatic amino acids decreased triglycerides and alleviated hepatic steatosis by stimulating bile acid synthesis in mice
Source: Royal Society of Chemistry journal article supplement (doi:10.1039/d0fo02364g), 2020-12-10
Supplement: d0fo02364g1.pdf [file d0fo02364g1.pdf]

### Supplementary Materials:

Table S1. Identified differential metabolites involved in other pathways between CDA and CD on positive-ion model or negative-ion model in liver.

| Metabolites                                                  | POS/NEG model | Fold change | VIP  | <i>P</i> -value | Pathways |
|--------------------------------------------------------------|---------------|-------------|------|-----------------|----------|
| 2-Hydroxyadenine                                             | POS           | 0.80        | 1.19 | 0.045           | Other    |
| N6-Methyl-L-lysine                                           | POS           | 0.72        | 1.48 | 0.001           | Other    |
| NG,NG-dimethyl-L-arginine(ADMA)                              | POS           | 0.72        | 9.26 | 0.008           | Other    |
| alpha-N-Acetyl-L-glutamine                                   | POS           | 2.10        | 1.12 | 0.024           | Other    |
| trans-2-Hydroxycinnamic acid                                 | POS           | 1.58        | 1.64 | 0.024           | Other    |
| 16-Hydroxypalmitic acid                                      | POS           | 0.36        | 1.02 | 0.028           | Other    |
| Isopentenyladenosine                                         | POS           | 0.73        | 1.29 | 0.030           | Other    |
| EDTA                                                         | POS           | 0.75        | 1.00 | 0.040           | Other    |
| 2-Hydroxyadenine                                             | POS           | 0.80        | 1.19 | 0.045           | Other    |
| L-NG-Monomethylarginine                                      | POS           | 0.80        | 2.08 | 0.053           | Other    |
| 1-Palmitoyl-2-hydroxy-sn-glycero-3-phosphoethanolamine       | NEG           | 0.47        | 4.65 | 0.002           | Other    |
| (4Z,7Z,10Z,13Z,16Z,19Z)-4,7,10,13,16,19-Docosahexaenoic acid | NEG           | 0.57        | 1.29 | 0.002           | Other    |
| PGA1                                                         | NEG           | 0.73        | 1.30 | 0.010           | Other    |
| (+)-12-HETE                                                  | NEG           | 0.55        | 2.95 | 0.036           | Other    |
| Myristoleic acid                                             | NEG           | 0.44        | 1.17 | 0.086           | Other    |

VIP>1 and *P* value <0.05 are regarded as significantly differential metabolites; VIP>1 and 0.05<*P* value<0.1 are regarded as differential metabolites.

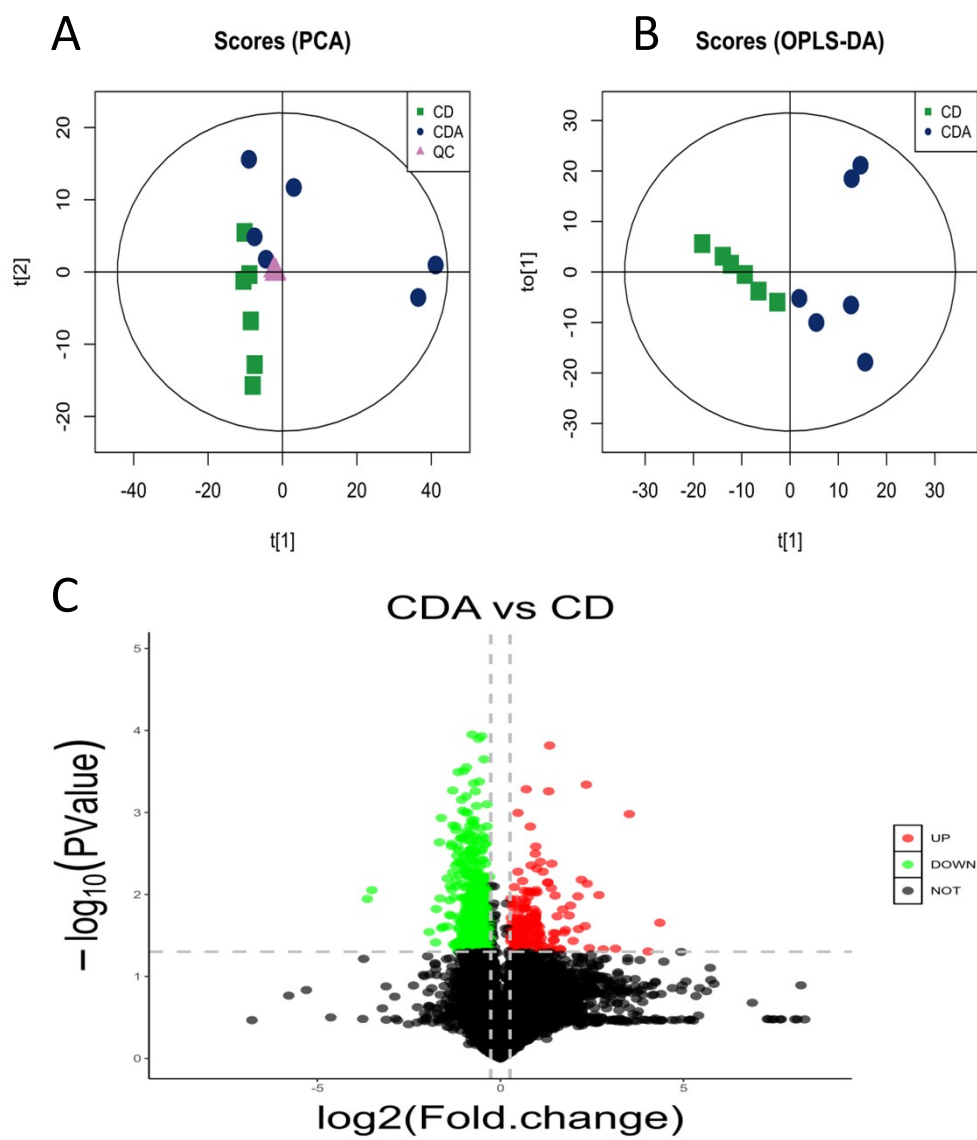

Figure S1. The PCA, OPLS-DA score plot and Volcano Plot for the metabolic profiling results of

liver tissue for CDA versus CD. A: PCA score plot.  $t[1]$  represents principal component 1, and  $t[2]$  represents principal component 2. B: OPLS-DA score plot.  $t[1]$  represents the predicted principal component and can distinguish group variations. C: Volcano Plot. The dots represents metabolites with  $FC > 1.5$  and  $P$  value  $< 0.05$ . Red dots indicate up-regulated metabolites in CDA, and green dots indicate down-regulated metabolites in CDA. Abbreviations: control diet (CD), and control diet with extra AAA (CDA); quality control (QC); principal component analysis (PCA); orthogonal partial least squares discrimination analysis (OPLS-DA); fold change analysis (FC).

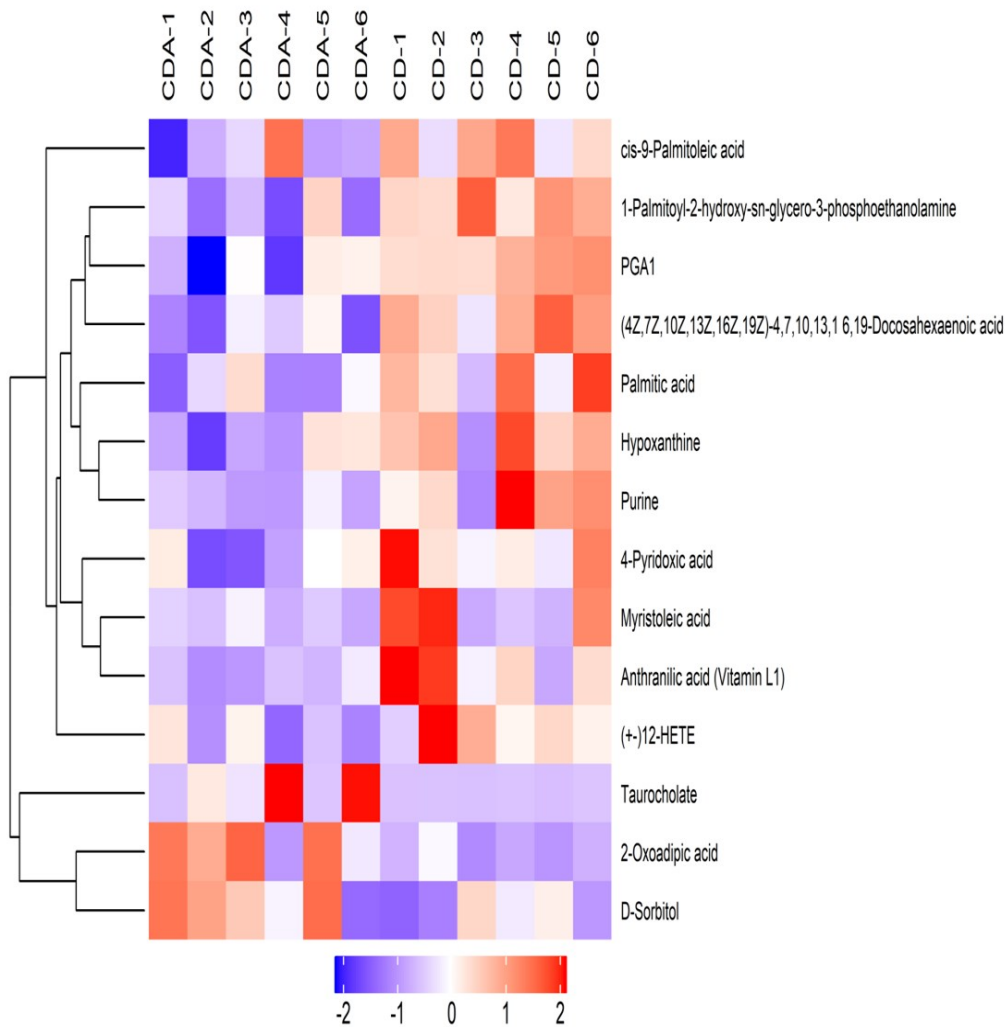

Figure S2. The Hierarchical Clustering of significant differences metabolites for CDA versus CD. Red indicates the up-regulated metabolites in CDA, and blue indicates the down-regulated metabolites in CDA. Scaled expression values are color-coded according to the legend on the

bottom. Abbreviations: control diet (CD), and control diet with extra AAA (CDA).

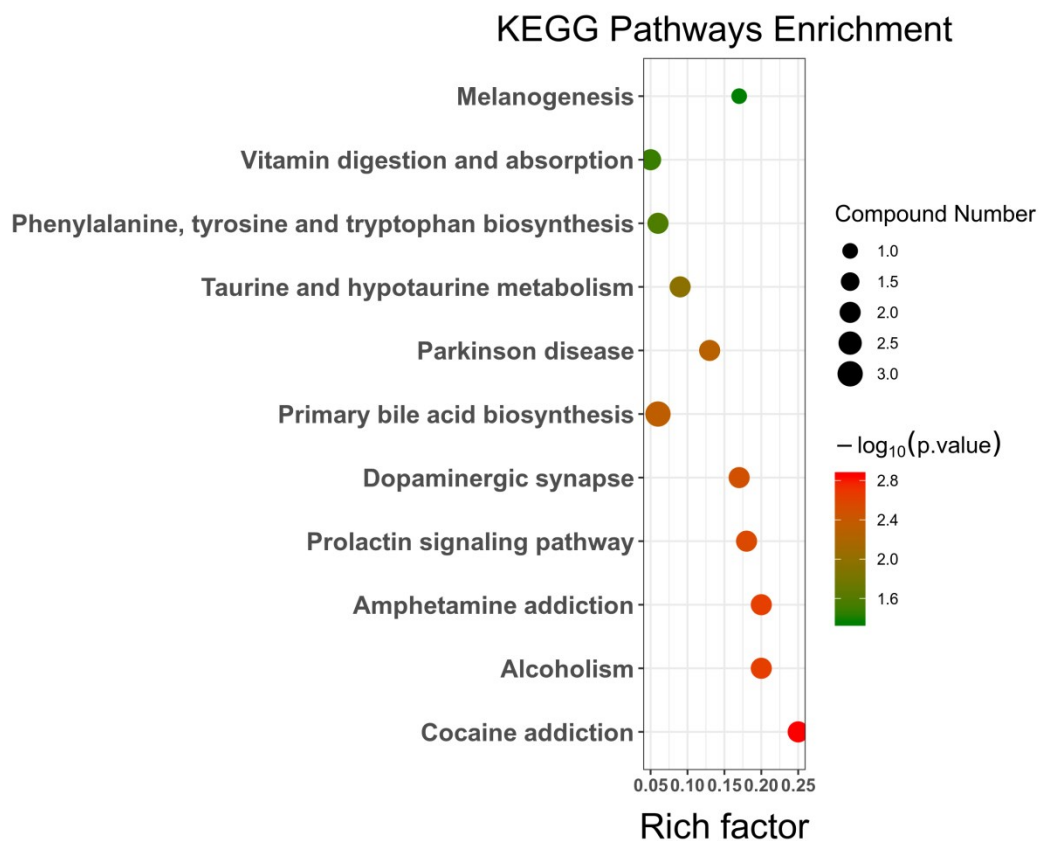

Figure S3. KEGG patCDay enrichment results based on metabolites alteration. The size of the dots represents the number of significant metabolites; the smaller  $P$  value indicates that KEGG patCDay enrichment is more significant.

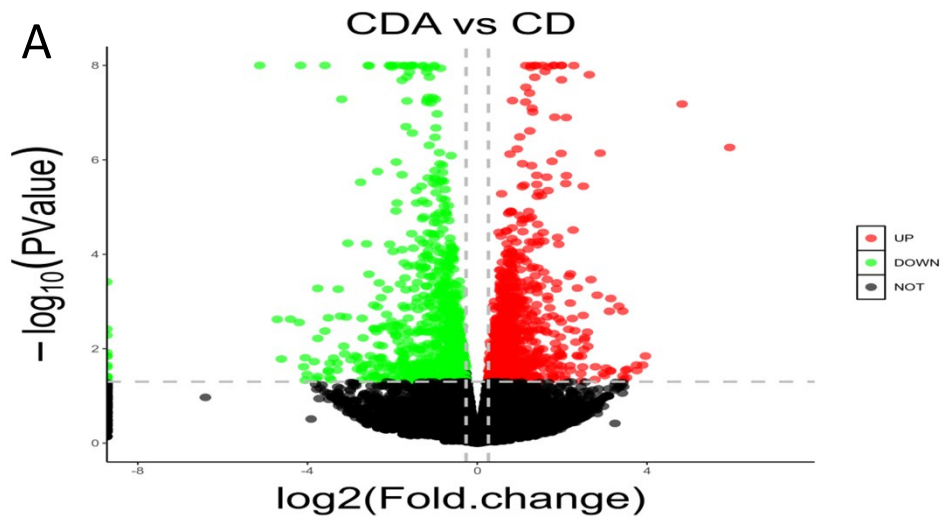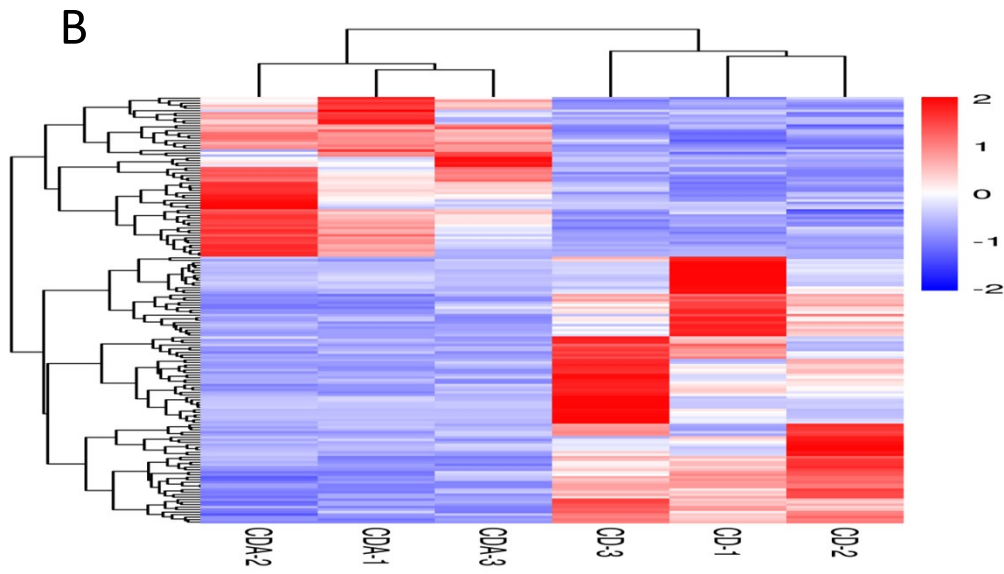

Figure S4. Volcano Plot and Hierarchical Clustering of differential genes for CDA versus CD. A: Volcano Plot. The black dots represent the genes with no significant difference, the red dots represent the up-regulated genes with significant difference, and the green dots represent the down-regulated genes with significant difference. B: The Hierarchical Clustering of differential genes. Red indicates the up-regulated genes in CDA, and blue indicates the down-regulated genes in CDA. Scaled expression values are color-coded according to the legend on the right. Abbreviations: control diet (CD), and control diet with extra AAA (CDA).

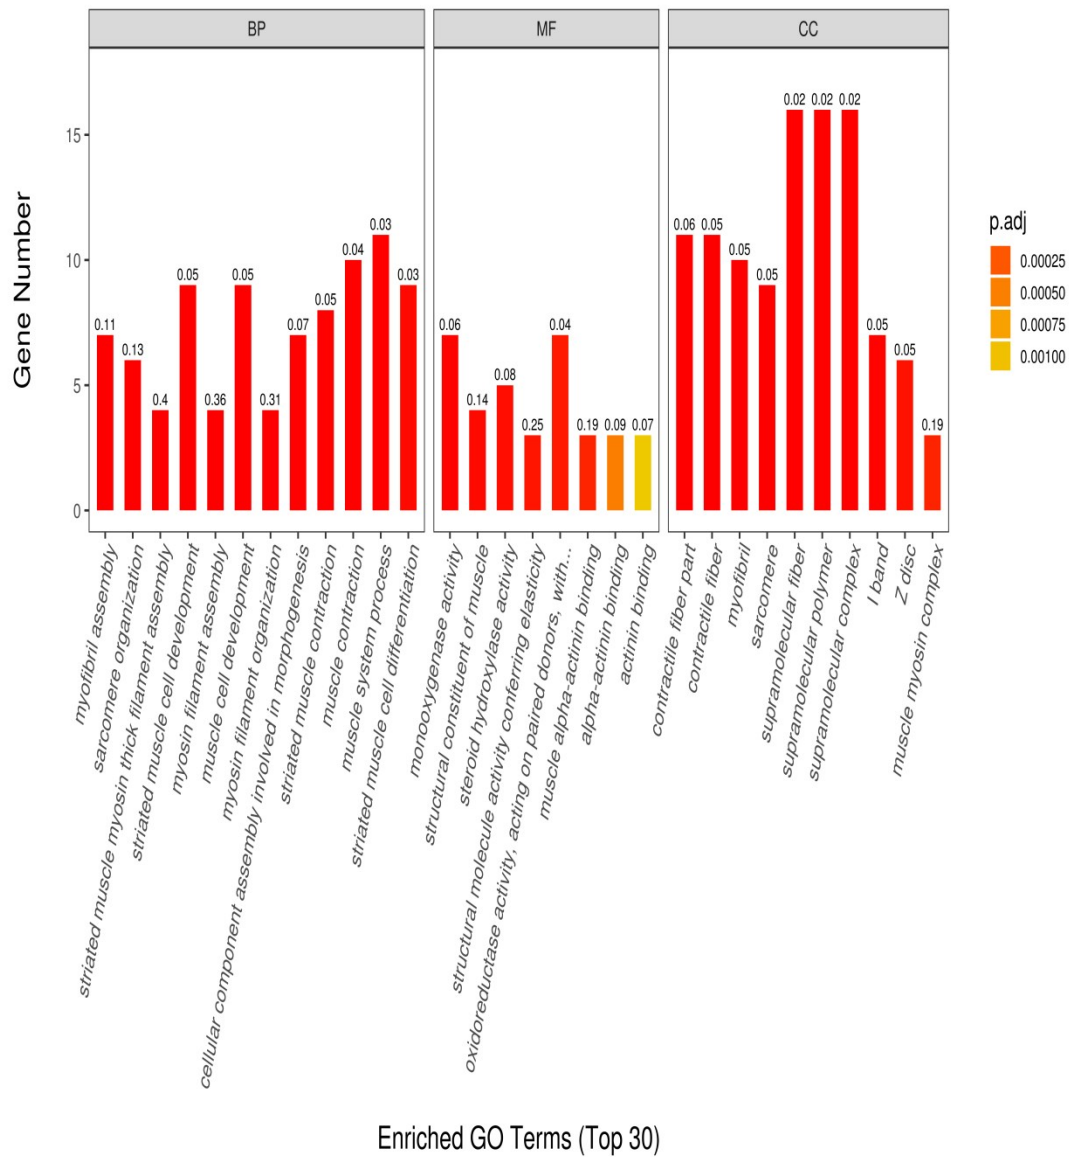

Figure S5. Gene ontology (GO) enrichment histogram of differential genes. Abbreviations of classifications: BP: biological processes; MF: molecular functions; CC: cellular components.
